# Supplementary material
Source: PubMed Central journal article supplement (PMC4983440)
Supplement: NIHMS799860-supplement-Suppl.pdf [file NIHMS799860-supplement-Suppl.pdf]

Electronic Supplementary Material for: “Combining Two-Dimensional Diffusion-Ordered Nuclear Magnetic Resonance Spectroscopy, Imaging Desorption Electrospray Ionization Mass Spectrometry and Direct Analysis in Real Time Mass Spectrometry for the Integral Investigation of Counterfeit Pharmaceuticals”, by Nyadong et al.

**Table S-1.** <sup>1</sup>H NMR data of active pharmaceutical ingredients detected in the artesunate antimalarial samples investigated in this study.

| Acetaminophen                                                                     |                                                      |                | Dipyron                                                                           |                                                      |                | Artesunic acid                                                                      |                                                      |                | Artemisinin                                                                         |                                                      |                |
|-----------------------------------------------------------------------------------|------------------------------------------------------|----------------|-----------------------------------------------------------------------------------|------------------------------------------------------|----------------|-------------------------------------------------------------------------------------|------------------------------------------------------|----------------|-------------------------------------------------------------------------------------|------------------------------------------------------|----------------|
| 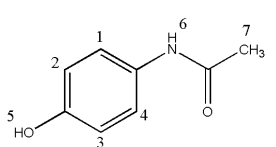 |                                                      |                |  |                                                      |                |  |                                                      |                |  |                                                      |                |
| $\delta$ (ppm) <sup>a</sup>                                                       | Number of protons, multiplicity <sup>b</sup> (J, Hz) | N <sup>o</sup> | $\delta$ (ppm) <sup>a</sup>                                                       | Number of protons, multiplicity <sup>b</sup> (J, Hz) | N <sup>o</sup> | $\delta$ (ppm) <sup>a</sup>                                                         | Number of protons, multiplicity <sup>b</sup> (J, Hz) | N <sup>o</sup> | $\delta$ (ppm) <sup>a</sup>                                                         | Number of protons, multiplicity <sup>b</sup> (J, Hz) | N <sup>o</sup> |
| 9.67                                                                              | 1H, s                                                | 6              | 7.48                                                                              | 2H, t (7.9)                                          | 2/4            | 5.69                                                                                | 1H, d (9.6)                                          | 10             | 6.15                                                                                | 1H, s                                                | 12             |
| 9.16                                                                              | 1H, s                                                | 5              | 7.38                                                                              | 2H, d (7.9)                                          | 3/5            | 5.57                                                                                | 1H, s                                                | 12             | 3.18                                                                                | 1H, m                                                | 9              |
| 7.35                                                                              | 2H, d (8.6)                                          | 1/4            | 7.28                                                                              | 1H, t (7.9)                                          | 1              | 2.62/2.52                                                                           | 4H, m                                                | 14/15          | 2.29                                                                                | 1H, m                                                | 4              |
| 6.69                                                                              | 2H, d (8.6)                                          | 2/3            | 3.68                                                                              | 2H, s                                                | 9              | 2.31                                                                                | 1H, m                                                | 9              | 2.08                                                                                | 1H, m                                                | 4              |
| 2.00                                                                              | 3H, s                                                | 7              | 2.91                                                                              | 3H, s                                                | 6              | 2.21                                                                                | 1H, m                                                | 4              | 1.95                                                                                | 1H, m                                                | 5              |
|                                                                                   |                                                      |                | 2.90                                                                              | 3H, s                                                | 8              | 2.03                                                                                | 1H, m                                                | 4              | 1.81                                                                                | 1H, m                                                | 8a             |
|                                                                                   |                                                      |                | 2.27                                                                              | 3H, s                                                | 7              | 1.84                                                                                | 1H, m                                                | 5              | 1.75                                                                                | 1H, m                                                | 8              |
|                                                                                   |                                                      |                |                                                                                   |                                                      |                | 1.65                                                                                | 1H, m                                                | 8              | 1.66                                                                                | 1H, m                                                | 7              |
|                                                                                   |                                                      |                |                                                                                   |                                                      |                | 1.65                                                                                | 1H, m                                                | 7              | 1.56                                                                                | 1H, m                                                | 6              |
|                                                                                   |                                                      |                |                                                                                   |                                                      |                | 1.58                                                                                | 1H, m                                                | 8a             | 1.38                                                                                | 3H, s                                                | 3Me            |
|                                                                                   |                                                      |                |                                                                                   |                                                      |                | 1.48                                                                                | 1H, m                                                | 8              | 1.36                                                                                | 1H, m                                                | 5a             |
|                                                                                   |                                                      |                |                                                                                   |                                                      |                | 1.44                                                                                | 1H, m                                                | 6              | 1.34                                                                                | 1H, m                                                | 5              |
|                                                                                   |                                                      |                |                                                                                   |                                                      |                | 1.35                                                                                | 1H, m                                                | 5              | 1.17                                                                                | 1H, m                                                | 8              |
|                                                                                   |                                                      |                |                                                                                   |                                                      |                | 1.31                                                                                | 3H, s                                                | 3Me            | 1.09                                                                                | 3H, d (6.6)                                          | 9Me            |
|                                                                                   |                                                      |                |                                                                                   |                                                      |                | 1.21                                                                                | 1H, m                                                | 5a             | 1.03                                                                                | 1H, m                                                | 7              |
|                                                                                   |                                                      |                |                                                                                   |                                                      |                | 0.97                                                                                | 1H, m                                                | 7              | 0.94                                                                                | 3H, d (6.6)                                          | 6Me            |
|                                                                                   |                                                      |                |                                                                                   |                                                      |                | 0.91                                                                                | 3H, d (6.6)                                          | 6Me            |                                                                                     |                                                      |                |
|                                                                                   |                                                      |                |                                                                                   |                                                      |                | 0.79                                                                                | 1H, d (6.6)                                          | 9Me            |                                                                                     |                                                      |                |

<sup>a</sup> Spectra were recorded at 298K in DMSO-d<sub>6</sub>.

<sup>b</sup> s: singlet; d: doublet; t: triplet; m: multiplet.

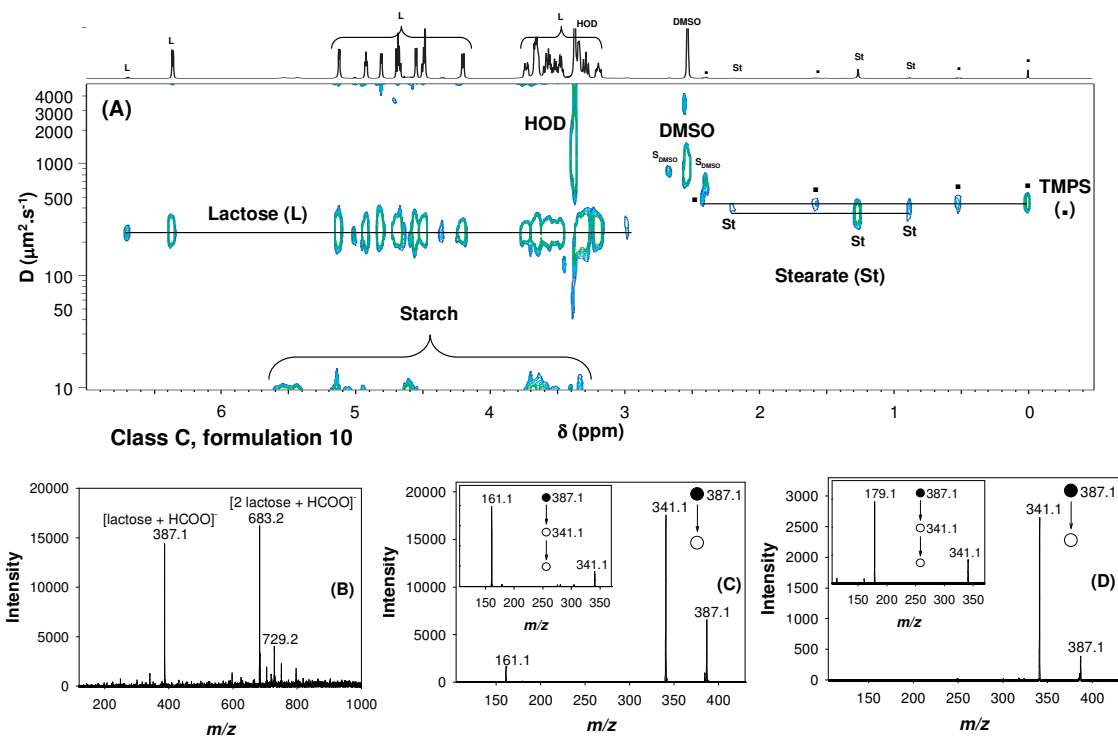

**Figure S-1.** Analysis of formulation **10** by: (A) 2D DOSY  $^1\text{H}$  NMR in  $\text{DMSO-d}_6$  with TMPS as internal reference standard ( $S_{\text{DMSO}}$  represents DMSO satellite signals), and (B) DESI MS in negative ion mode (using a spray solution of 99.9:0.1% v/v MeOH:HCOOH), (C) DESI MS $^2$  of the precursor ion at  $m/z$  387.1 from sample **10** in negative ion mode, and (D) DESI MS $^2$  of the precursor ion at  $m/z$  387.1 of sample **11** in negative ion mode. The inserts in (C) and (D) represent the corresponding DESI MS $^3$  spectra generated from the ions at  $m/z$  341.1.

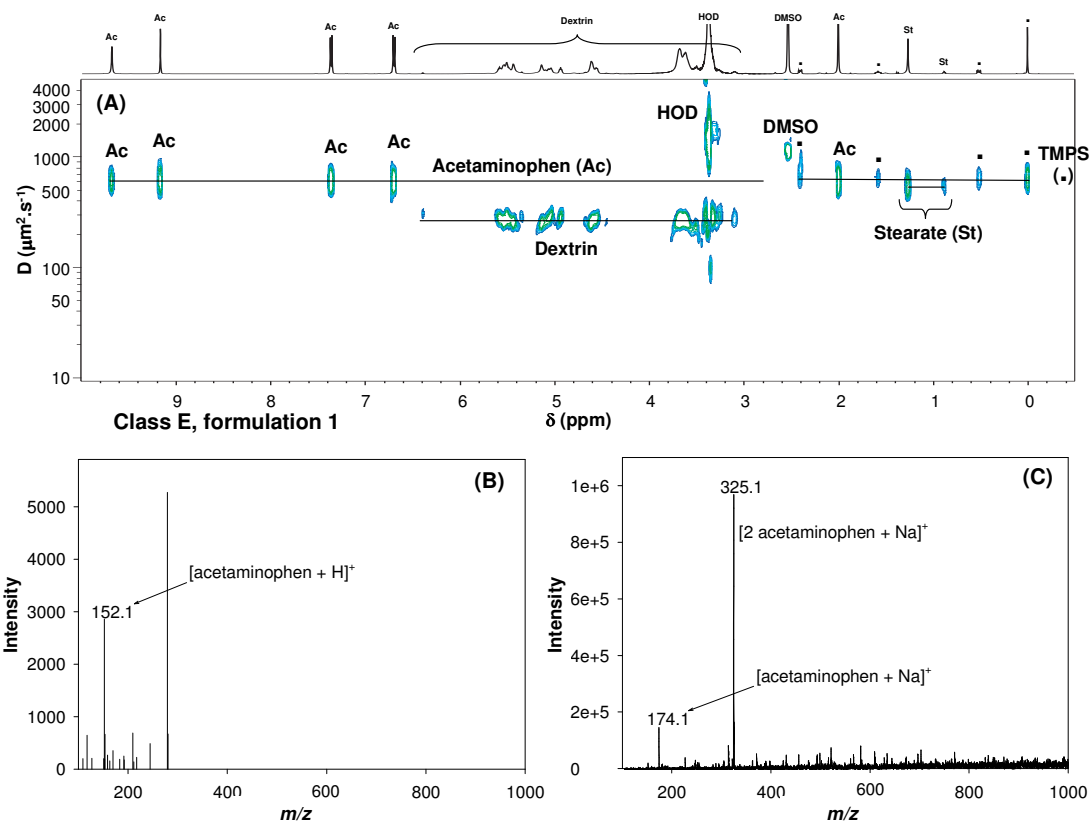

**Figure S-2.** Analysis of formulation **1** by: (A) 2D DOSY  $^1\text{H}$  NMR in  $\text{DMSO-d}_6$  with TMPS as internal reference standard, (B) DART MS in positive ion mode, and (C) DESI MS in positive ion mode.

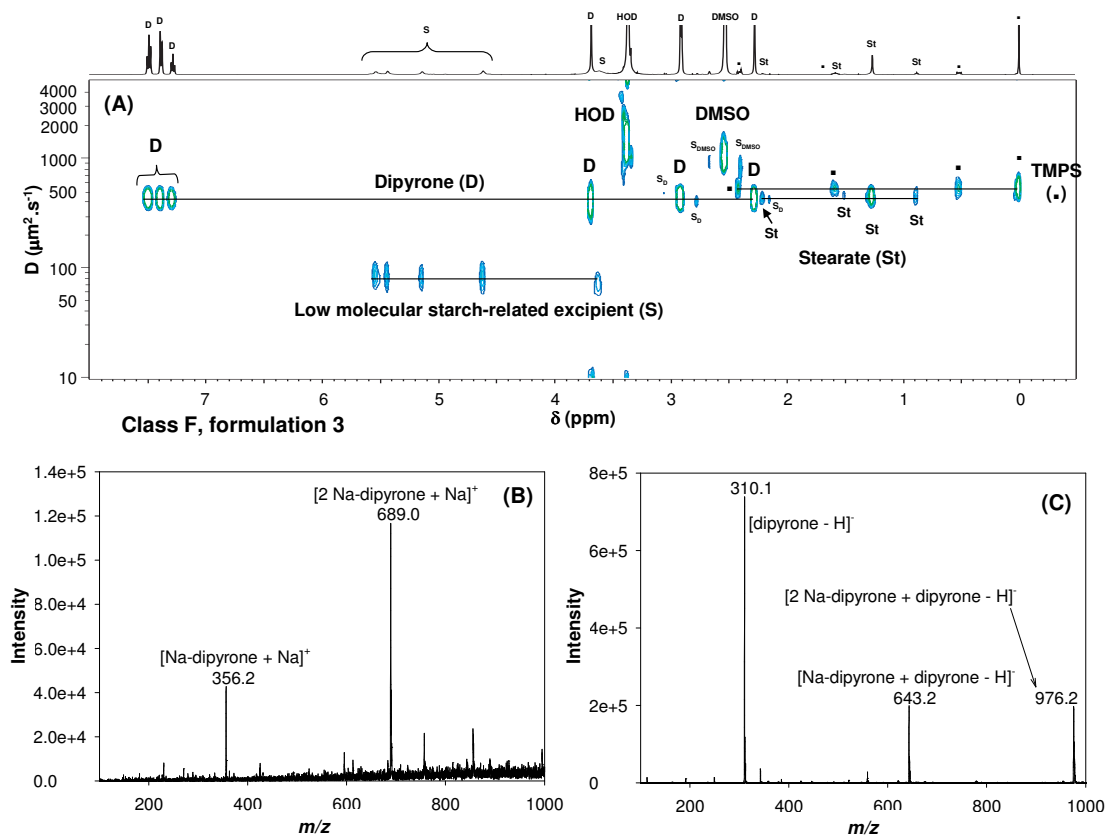

**Figure S-3.** Analysis of formulation 3 by: (A) 2D DOSY  $^1\text{H}$  NMR in  $\text{DMSO-d}_6$  with TMPS as internal reference standard ( $S_{\text{DMSO}}$  and  $S_D$  represent DMSO and dipyrone satellite peaks, respectively); and by DESI MS in (B) positive ion mode, and (C) negative ion mode.
